# Supplementary material for: COVID-19 Exposure, Stress, and Mental Health Outcomes: Results From a Needs Assessment Among Low Income Adults in Central North Carolina
Source: PubMed Central journal article supplement (PMC8812254; doi:10.3389/fpsyt.2021.790468), 2022-01-20
Supplement: Table_1.pdf [file Table_1.pdf]

**Online Supplement Table 1. Sample Demographic Information.**

| Demographic Characteristic                        | n (%)       |
|---------------------------------------------------|-------------|
| Age                                               |             |
| 18-25                                             | 17 (10.9%)  |
| 26-35                                             | 42 (26.9%)  |
| 36-45                                             | 74 (47.4%)  |
| 46-55                                             | 17 (10.9%)  |
| 56-64                                             | 5 (3.2%)    |
| 64-74                                             | 1 (0.6%)    |
| County of Residence                               |             |
| Charlotte/Mecklenburg                             | 72 (46.2%)  |
| Lincoln                                           | 49 (31.4%)  |
| Cabarrus                                          | 19 (12.2%)  |
| Gaston                                            | 15 (9.6%)   |
| Union                                             | 1 (0.6%)    |
| Race                                              |             |
| White                                             | 53 (34.0%)  |
| American Indian/Alaskan Native/Other <sup>1</sup> | 47 (30.1%)  |
| Black/African American                            | 45 (28.8%)  |
| Asian/Pacific Islander                            | 6 (3.8%)    |
| Multiracial                                       | 3 (1.9%)    |
| Biracial                                          | 2 (1.3%)    |
| Ethnicity                                         |             |
| Hispanic/Latino(a)                                | 71 (46.7%)  |
| Non-Hispanic/Latino(a)                            | 68 (44.7%)  |
| Other                                             | 13 (8.6%)   |
| Health Insurance                                  |             |
| Yes                                               | 128 (86.5%) |
| No                                                | 20 (13.5%)  |

|                                  |  |             |
|----------------------------------|--|-------------|
| <b>Born in the United States</b> |  |             |
| Yes                              |  | 151 (99.3%) |
| No                               |  | 1 (0.7%)    |
| <b>Gender</b>                    |  |             |
| Man                              |  | 79 (51.0%)  |
| Woman                            |  | 75 (48.4%)  |
| Transgender man or woman         |  | 1 (0.6%)    |
| <b>Education Level</b>           |  |             |
| Less than high school            |  | 3 (1.9%)    |
| Some high school                 |  | 7 (4.5%)    |
| High school diploma/GED          |  | 28 (18.2%)  |
| Associate's degree               |  | 85 (55.2%)  |
| Bachelor's degree                |  | 25 (16.2%)  |
| Graduate degree                  |  | 6 (3.9%)    |
| <b>Employment Status</b>         |  |             |
| Full-time                        |  | 69 (44.2%)  |
| Part-time                        |  | 51 (32.7%)  |
| Unemployed                       |  | 26 (16.7%)  |
| More than one job                |  | 4 (2.6%)    |
| Retired                          |  | 1 (0.6%)    |

<sup>1</sup>The Charlotte-Mecklenburg region comprises less than 0.5% American Indian/Alaskan Native (AI/AN) persons. We investigated possible explanations of random responding or a systematic influence on race responses. AI/AN was the first option presented to respondents and persons indicating this race category were also systematically more likely to report lower education. Thus, we interpret the high rate of AI/AN persons in the dataset as a result of reading comprehension. It is likely that respondents read this as “American” and checked the response. Therefore, race data should be interpreted with caution.
